# Supplementary material for: Structural analysis of urinary light chains and proteomic analysis of hyaline tubular casts in light chain associated kidney disorders
Source: PeerJ. 2019 Oct 2;7:e7819. doi: 10.7717/peerj.7819 (PMC6778432; doi:10.7717/peerj.7819)
Supplement: Table S1 [file peerj-07-7819-s002.xlsx]

## Sheet: Tabelle1
Accession	Protein group accessions	Description	Genes	GO Accessions	Pfam IDs	MW[kDa]	Norm. Area	Coverage	# Peptides
P0CG04.1	B9A064.2; P0DOY2.1; P0CF74.1; P0DOX8.1	Immunoglobulin lambda constant 1	IGLC1	[GO:0002250]; GO:0006955; GO:0002376; GO:0050896; GO:0008150 [GO:0002376]; GO:0008150 [GO:0003823]; GO:0005488; GO:0003674 [GO:0004252]; GO:0004175; GO:0008236; GO:0070011; GO:0017171; GO:0008233; GO:0016787; GO:0140096; GO:0003824; GO:0003674 [GO:0005576]; GO:0005575 [GO:0005615]; GO:0044421; GO:0005575; GO:0005576 [GO:0005886]; GO:0016020; GO:0044464; GO:0071944; GO:0005575; GO:0005623 [GO:0006…	Pf07654, Pf08205, Pf13927	11.341	3.92064e+07	0.245283	8
P0DOX8.1	B9A064.2; P0DOY2.1; P0CF74.1; P0CG04.1	Immunoglobulin lambda-1 light chain		[GO:0002250]; GO:0006955; GO:0002376; GO:0050896; GO:0008150 [GO:0002376]; GO:0008150 [GO:0003823]; GO:0005488; GO:0003674 [GO:0005576]; GO:0005575 [GO:0005886]; GO:0016020; GO:0044464; GO:0071944; GO:0005575; GO:0005623 [GO:0016020]; GO:0005575	Pf07654, Pf07679, Pf07686, Pf08205, Pf13927	22.816	2.28704e+07	0.12037	8
B9A064.2	P0DOY2.1; P0CF74.1; P0CG04.1; P0DOX8.1	Immunoglobulin lambda-like polypeptide 5	IGLL5	[GO:0003823]; GO:0005488; GO:0003674 [GO:0005576]; GO:0005575 [GO:0006910]; GO:0006909; GO:0008037; GO:0006897; GO:0009987; GO:0016192; GO:0098657; GO:0008150; GO:0006810; GO:0051234; GO:0051179 [GO:0006911]; GO:0006909; GO:0099024; GO:0006897; GO:0010324; GO:0016192; GO:0098657; GO:0061024; GO:0006810; GO:0016043; GO:0051234; GO:0009987; GO:0071840; GO:0051179; GO:0008150 [GO:0006958]; GO:000245…	Pf07654, Pf08205, Pf13927	23.049	2.11112e+07	0.121495	8
P0CF74.1	B9A064.2; P0DOY2.1; P0CG04.1; P0DOX8.1	Immunoglobulin lambda constant 6	IGLC6	[GO:0002250]; GO:0006955; GO:0002376; GO:0050896; GO:0008150 [GO:0002376]; GO:0008150 [GO:0003823]; GO:0005488; GO:0003674 [GO:0004252]; GO:0004175; GO:0008236; GO:0070011; GO:0017171; GO:0008233; GO:0016787; GO:0140096; GO:0003824; GO:0003674 [GO:0005576]; GO:0005575 [GO:0005615]; GO:0044421; GO:0005575; GO:0005576 [GO:0005886]; GO:0016020; GO:0044464; GO:0071944; GO:0005575; GO:0005623 [GO:0006…	Pf07654, Pf08205, Pf13927	11.27	1.95939e+07	0.169811	5
P0DOY3.1		Immunoglobulin lambda constant 3	IGLC3	[GO:0002250]; GO:0006955; GO:0002376; GO:0050896; GO:0008150 [GO:0002376]; GO:0008150 [GO:0003823]; GO:0005488; GO:0003674 [GO:0005576]; GO:0005575 [GO:0005615]; GO:0044421; GO:0005575; GO:0005576 [GO:0005886]; GO:0016020; GO:0044464; GO:0071944; GO:0005575; GO:0005623 [GO:0016020]; GO:0005575 [GO:0070062]; GO:0005615; GO:1903561; GO:0044421; GO:0031982; GO:0043230; GO:0005575; GO:0005576; GO:004…	Pf07654, Pf13927	11.259	7.18521e+06	0.245283	4
P07858.3		Cathepsin B	CTSB	[GO:0002224]; GO:0002221; GO:0002758; GO:0002218; GO:0002757; GO:0002253; GO:0045089; GO:0002764; GO:0002376; GO:0050778; GO:0031349; GO:0045087; GO:0045088; GO:0007165; GO:0050776; GO:0008150; GO:0002684; GO:0006955; GO:0048584; GO:0006952; GO:0031347; GO:0007154; GO:0009987; GO:0023052; GO:0050794; GO:0051716; GO:0002682; GO:0048583; GO:0048518; GO:0050896; GO:0006950; GO:0080134; GO:0050789; G…	Pf00112, Pf08127	37.797	1.49269e+06	0.0235988	1
Q16778.3	Q5QNW6.3; Q99879.3; P33778.2; P58876.2; Q96A08.3; Q93079.3; O60814.3; Q99880.3; P62807.4; P57053.2; Q8N257.3; P06899.3; P23527.3; Q99877.3	Histone H2B type 2-E	HIST2H2BE	[GO:0000786]; GO:0000785; GO:0032993; GO:0044427; GO:0044815; GO:0032991; GO:0005694; GO:0044446; GO:0005575; GO:0043232; GO:0043229; GO:0044422; GO:0044424; GO:0043228; GO:0043226; GO:0005622; GO:0044464; GO:0005623 [GO:0002227]; GO:0002385; GO:0045087; GO:0002251; GO:0006952; GO:0006955; GO:0006950; GO:0002376; GO:0050896; GO:0008150 [GO:0003677]; GO:0003676; GO:0097159; GO:1901363; GO:0005488;…	Pf00125, Pf00808	13.912	1.01753e+06	0.134921	1
Q5QNW6.3	Q16778.3; Q99879.3; P33778.2; P58876.2; Q96A08.3; Q93079.3; O60814.3; Q99880.3; P62807.4; P57053.2; Q8N257.3; P06899.3; P23527.3; Q99877.3	Histone H2B type 2-F	HIST2H2BF	[GO:0000786]; GO:0000785; GO:0032993; GO:0044427; GO:0044815; GO:0032991; GO:0005694; GO:0044446; GO:0005575; GO:0043232; GO:0043229; GO:0044422; GO:0044424; GO:0043228; GO:0043226; GO:0005622; GO:0044464; GO:0005623 [GO:0003674] [GO:0003677]; GO:0003676; GO:0097159; GO:1901363; GO:0005488; GO:0003674 [GO:0005634]; GO:0043231; GO:0043227; GO:0043229; GO:0043226; GO:0044424; GO:0005575; GO:0005622…	Pf00125, Pf00808	13.912	1.01753e+06	0.134921	1
Q99879.3	Q16778.3; Q5QNW6.3; P33778.2; P58876.2; Q96A08.3; Q93079.3; O60814.3; Q99880.3; P62807.4; P57053.2; Q8N257.3; P06899.3; P23527.3; Q99877.3	Histone H2B type 1-M	HIST1H2BM	[GO:0000786]; GO:0000785; GO:0032993; GO:0044427; GO:0044815; GO:0032991; GO:0005694; GO:0044446; GO:0005575; GO:0043232; GO:0043229; GO:0044422; GO:0044424; GO:0043228; GO:0043226; GO:0005622; GO:0044464; GO:0005623 [GO:0003677]; GO:0003676; GO:0097159; GO:1901363; GO:0005488; GO:0003674 [GO:0005634]; GO:0043231; GO:0043227; GO:0043229; GO:0043226; GO:0044424; GO:0005575; GO:0005622; GO:0044464;…	Pf00125, Pf00808	13.981	1.01753e+06	0.134921	1
P33778.2	Q16778.3; Q5QNW6.3; Q99879.3; P58876.2; Q96A08.3; Q93079.3; O60814.3; Q99880.3; P62807.4; P57053.2; Q8N257.3; P06899.3; P23527.3; Q99877.3	Histone H2B type 1-B	HIST1H2BB	[GO:0000784]; GO:0000781; GO:0044454; GO:0098687; GO:0000228; GO:0044427; GO:0044428; GO:0005694; GO:0031981; GO:0044446; GO:0005634; GO:0043232; GO:0070013; GO:0043229; GO:0044422; GO:0044424; GO:0043231; GO:0043228; GO:0043233; GO:0043226; GO:0005575; GO:0005622; GO:0044464; GO:0043227; GO:0031974; GO:0005623 [GO:0000786]; GO:0000785; GO:0032993; GO:0044427; GO:0044815; GO:0032991; GO:0005694; …	Pf00125, Pf00808	13.942	1.01753e+06	0.134921	1
P58876.2	Q16778.3; Q5QNW6.3; Q99879.3; P33778.2; Q96A08.3; Q93079.3; O60814.3; Q99880.3; P62807.4; P57053.2; Q8N257.3; P06899.3; P23527.3; Q99877.3	Histone H2B type 1-D	HIST1H2BD	[GO:0000786]; GO:0000785; GO:0032993; GO:0044427; GO:0044815; GO:0032991; GO:0005694; GO:0044446; GO:0005575; GO:0043232; GO:0043229; GO:0044422; GO:0044424; GO:0043228; GO:0043226; GO:0005622; GO:0044464; GO:0005623 [GO:0003674] [GO:0003677]; GO:0003676; GO:0097159; GO:1901363; GO:0005488; GO:0003674 [GO:0005634]; GO:0043231; GO:0043227; GO:0043229; GO:0043226; GO:0044424; GO:0005575; GO:0005622…	Pf00125, Pf00808	13.928	1.01753e+06	0.134921	1
Q93079.3	Q16778.3; Q5QNW6.3; Q99879.3; P33778.2; P58876.2; Q96A08.3; O60814.3; Q99880.3; P62807.4; P57053.2; Q8N257.3; P06899.3; P23527.3; Q99877.3	Histone H2B type 1-H	HIST1H2BH	[GO:0000786]; GO:0000785; GO:0032993; GO:0044427; GO:0044815; GO:0032991; GO:0005694; GO:0044446; GO:0005575; GO:0043232; GO:0043229; GO:0044422; GO:0044424; GO:0043228; GO:0043226; GO:0005622; GO:0044464; GO:0005623 [GO:0003677]; GO:0003676; GO:0097159; GO:1901363; GO:0005488; GO:0003674 [GO:0005515]; GO:0005488; GO:0003674 [GO:0005634]; GO:0043231; GO:0043227; GO:0043229; GO:0043226; GO:0044424…	Pf00125, Pf00808	13.884	1.01753e+06	0.134921	1
Q99880.3	Q16778.3; Q5QNW6.3; Q99879.3; P33778.2; P58876.2; Q96A08.3; Q93079.3; O60814.3; P62807.4; P57053.2; Q8N257.3; P06899.3; P23527.3; Q99877.3	Histone H2B type 1-L	HIST1H2BL	[GO:0000786]; GO:0000785; GO:0032993; GO:0044427; GO:0044815; GO:0032991; GO:0005694; GO:0044446; GO:0005575; GO:0043232; GO:0043229; GO:0044422; GO:0044424; GO:0043228; GO:0043226; GO:0005622; GO:0044464; GO:0005623 [GO:0003677]; GO:0003676; GO:0097159; GO:1901363; GO:0005488; GO:0003674 [GO:0005634]; GO:0043231; GO:0043227; GO:0043229; GO:0043226; GO:0044424; GO:0005575; GO:0005622; GO:0044464;…	Pf00125, Pf00808	13.944	1.01753e+06	0.134921	1
P62807.4	Q16778.3; Q5QNW6.3; Q99879.3; P33778.2; P58876.2; Q96A08.3; Q93079.3; O60814.3; Q99880.3; P57053.2; Q8N257.3; P06899.3; P23527.3; Q99877.3	Histone H2B type 1-C/E/F/G/I	HIST1H2BI; HIST1H2BD; HIST1H2BC; HIST1H2BF; HIST1H2BG; HIST1H2BE	[GO:0000786]; GO:0000785; GO:0032993; GO:0044427; GO:0044815; GO:0032991; GO:0005694; GO:0044446; GO:0005575; GO:0043232; GO:0043229; GO:0044422; GO:0044424; GO:0043228; GO:0043226; GO:0005622; GO:0044464; GO:0005623 [GO:0002227]; GO:0002385; GO:0045087; GO:0002251; GO:0006952; GO:0006955; GO:0006950; GO:0002376; GO:0050896; GO:0008150 [GO:0003674] [GO:0003677]; GO:0003676; GO:0097159; GO:1901363…	Pf00125, Pf00808	13.898	1.01753e+06	0.134921	1
Q8N257.3	Q16778.3; Q5QNW6.3; Q99879.3; P33778.2; P58876.2; Q96A08.3; Q93079.3; O60814.3; Q99880.3; P62807.4; P57053.2; P06899.3; P23527.3; Q99877.3	Histone H2B type 3-B	HIST3H2BB	[GO:0000786]; GO:0000785; GO:0032993; GO:0044427; GO:0044815; GO:0032991; GO:0005694; GO:0044446; GO:0005575; GO:0043232; GO:0043229; GO:0044422; GO:0044424; GO:0043228; GO:0043226; GO:0005622; GO:0044464; GO:0005623 [GO:0003674] [GO:0003677]; GO:0003676; GO:0097159; GO:1901363; GO:0005488; GO:0003674 [GO:0005634]; GO:0043231; GO:0043227; GO:0043229; GO:0043226; GO:0044424; GO:0005575; GO:0005622…	Pf00125, Pf00808	13.9	1.01753e+06	0.134921	1
P23527.3	Q16778.3; Q5QNW6.3; Q99879.3; P33778.2; P58876.2; Q96A08.3; Q93079.3; O60814.3; Q99880.3; P62807.4; P57053.2; Q8N257.3; P06899.3; Q99877.3	Histone H2B type 1-O	HIST1H2BO	[GO:0000786]; GO:0000785; GO:0032993; GO:0044427; GO:0044815; GO:0032991; GO:0005694; GO:0044446; GO:0005575; GO:0043232; GO:0043229; GO:0044422; GO:0044424; GO:0043228; GO:0043226; GO:0005622; GO:0044464; GO:0005623 [GO:0003677]; GO:0003676; GO:0097159; GO:1901363; GO:0005488; GO:0003674 [GO:0005634]; GO:0043231; GO:0043227; GO:0043229; GO:0043226; GO:0044424; GO:0005575; GO:0005622; GO:0044464;…	Pf00125, Pf00808	13.898	1.01753e+06	0.134921	1
Q99877.3	Q16778.3; Q5QNW6.3; Q99879.3; P33778.2; P58876.2; Q96A08.3; Q93079.3; O60814.3; Q99880.3; P62807.4; P57053.2; Q8N257.3; P06899.3; P23527.3	Histone H2B type 1-N	HIST1H2BN	[GO:0000786]; GO:0000785; GO:0032993; GO:0044427; GO:0044815; GO:0032991; GO:0005694; GO:0044446; GO:0005575; GO:0043232; GO:0043229; GO:0044422; GO:0044424; GO:0043228; GO:0043226; GO:0005622; GO:0044464; GO:0005623 [GO:0003677]; GO:0003676; GO:0097159; GO:1901363; GO:0005488; GO:0003674 [GO:0005634]; GO:0043231; GO:0043227; GO:0043229; GO:0043226; GO:0044424; GO:0005575; GO:0005622; GO:0044464;…	Pf00125, Pf00808	13.914	1.01753e+06	0.134921	1
P31151.4		Protein S100-A7	S100A7	[GO:0000302]; GO:0006979; GO:1901700; GO:0006950; GO:0042221; GO:0050896; GO:0008150 [GO:0001525]; GO:0048514; GO:0048646; GO:0001568; GO:0009653; GO:0032502; GO:0001944; GO:0048856; GO:0008150; GO:0048731; GO:0072358; GO:0007275; GO:0072359; GO:0032501 [GO:0005509]; GO:0046872; GO:0043169; GO:0043167; GO:0005488; GO:0003674 [GO:0005515]; GO:0005488; GO:0003674 [GO:0005576]; GO:0005575 [GO:000561…	Pf01023	11.464	934306	0.277228	3
Q96A08.3	Q16778.3; Q5QNW6.3; Q99879.3; P33778.2; P58876.2; Q93079.3; O60814.3; Q99880.3; P62807.4; P57053.2; Q8N257.3; P06899.3; P23527.3; Q99877.3	Histone H2B type 1-A	HIST1H2BA	[GO:0000784]; GO:0000781; GO:0044454; GO:0098687; GO:0000228; GO:0044427; GO:0044428; GO:0005694; GO:0031981; GO:0044446; GO:0005634; GO:0043232; GO:0070013; GO:0043229; GO:0044422; GO:0044424; GO:0043231; GO:0043228; GO:0043233; GO:0043226; GO:0005575; GO:0005622; GO:0044464; GO:0043227; GO:0031974; GO:0005623 [GO:0000786]; GO:0000785; GO:0032993; GO:0044427; GO:0044815; GO:0032991; GO:0005694; …	Pf00125, Pf00808	14.159	890341	0.133858	1
O00584.2		Ribonuclease T2	RNASET2	[GO:0003723]; GO:0003676; GO:0097159; GO:1901363; GO:0005488; GO:0003674 [GO:0004518]; GO:0016788; GO:0016787; GO:0003824; GO:0003674 [GO:0004519]; GO:0004518; GO:0016788; GO:0016787; GO:0003824; GO:0003674 [GO:0004540]; GO:0004518; GO:0140098; GO:0016788; GO:0003824; GO:0016787; GO:0003674 [GO:0005576]; GO:0005575 [GO:0005615]; GO:0044421; GO:0005575; GO:0005576 [GO:0005764]; GO:0000323; GO:0005…	Pf00445	29.462	764889	0.0664062	1
P01834.2	P0DOX7.1	Immunoglobulin kappa constant	IGKC	[GO:0001895]; GO:0001894; GO:0048871; GO:0060249; GO:0032501; GO:0042592; GO:0008150; GO:0065008; GO:0065007 [GO:0002250]; GO:0006955; GO:0002376; GO:0050896; GO:0008150 [GO:0002376]; GO:0008150 [GO:0002377]; GO:0002440; GO:0002376; GO:0008150 [GO:0003823]; GO:0005488; GO:0003674 [GO:0004252]; GO:0004175; GO:0008236; GO:0070011; GO:0017171; GO:0008233; GO:0016787; GO:0140096; GO:0003824; GO:00036…	Pf07654	11.758	680792	0.17757	1
P01860.2		Immunoglobulin heavy constant gamma 3	IGHG3	[GO:0001895]; GO:0001894; GO:0048871; GO:0060249; GO:0032501; GO:0042592; GO:0008150; GO:0065008; GO:0065007 [GO:0002250]; GO:0006955; GO:0002376; GO:0050896; GO:0008150 [GO:0002376]; GO:0008150 [GO:0003823]; GO:0005488; GO:0003674 [GO:0004252]; GO:0004175; GO:0008236; GO:0070011; GO:0017171; GO:0008233; GO:0016787; GO:0140096; GO:0003824; GO:0003674 [GO:0005576]; GO:0005575 [GO:0005615]; GO:0044…	Pf07654, Pf08205	41.26	667296	0.0689655	2
Q6ZVX7.1		F-box only protein 50	NCCRP1	[GO:0005737]; GO:0044424; GO:0005622; GO:0044464; GO:0005575; GO:0005623 [GO:0008284]; GO:0008283; GO:0042127; GO:0048522; GO:0008150; GO:0050794; GO:0009987; GO:0048518; GO:0050789; GO:0065007 [GO:0070062]; GO:0005615; GO:1903561; GO:0044421; GO:0031982; GO:0043230; GO:0005575; GO:0005576; GO:0043227; GO:0043226	Pf04300	30.828	624810	0.0509091	2
Q5T749.1		Keratinocyte proline-rich protein	KPRP	[GO:0005515]; GO:0005488; GO:0003674 [GO:0005737]; GO:0044424; GO:0005622; GO:0044464; GO:0005575; GO:0005623 [GO:0070062]; GO:0005615; GO:1903561; GO:0044421; GO:0031982; GO:0043230; GO:0005575; GO:0005576; GO:0043227; GO:0043226		64.093	534135	0.107081	5
P0DOX7.1	P01834.2	Immunoglobulin kappa light chain		[GO:0002250]; GO:0006955; GO:0002376; GO:0050896; GO:0008150 [GO:0002376]; GO:0008150 [GO:0003823]; GO:0005488; GO:0003674 [GO:0005576]; GO:0005575 [GO:0005886]; GO:0016020; GO:0044464; GO:0071944; GO:0005575; GO:0005623 [GO:0016020]; GO:0005575	Pf00047, Pf07654, Pf07679, Pf07686, Pf13927	23.364	340396	0.088785	1
Q9H1E1.2		Ribonuclease 7	RNASE7	[GO:0001530]; GO:0008289; GO:0097367; GO:0005488; GO:0003674 [GO:0003676]; GO:0097159; GO:1901363; GO:0005488; GO:0003674 [GO:0004518]; GO:0016788; GO:0016787; GO:0003824; GO:0003674 [GO:0004519]; GO:0004518; GO:0016788; GO:0016787; GO:0003824; GO:0003674 [GO:0004540]; GO:0004518; GO:0140098; GO:0016788; GO:0003824; GO:0016787; GO:0003674 [GO:0005576]; GO:0005575 [GO:0005615]; GO:0044421; GO:0005…	Pf00074	17.408	286321	0.102564	2
Q05639.1	P68104.1; Q5VTE0.1	Elongation factor 1-alpha 2	EEF1A2	[GO:0000166]; GO:0036094; GO:1901265; GO:0005488; GO:0097159; GO:1901363; GO:0003674 [GO:0003746]; GO:0008135; GO:0003723; GO:0003676; GO:0097159; GO:1901363; GO:0005488; GO:0003674 [GO:0003924]; GO:0017111; GO:0016462; GO:0016818; GO:0016817; GO:0016787; GO:0003824; GO:0003674 [GO:0005515]; GO:0005488; GO:0003674 [GO:0005525]; GO:0032550; GO:0032561; GO:0035639; GO:0001883; GO:0032549; GO:001900…	Pf00009, Pf03143, Pf03144	50.438	149069	0.0323974	1
P68104.1	Q05639.1; Q5VTE0.1	Elongation factor 1-alpha 1	EEF1A1	[GO:0000049]; GO:0003723; GO:0003676; GO:0097159; GO:1901363; GO:0005488; GO:0003674 [GO:0000166]; GO:0036094; GO:1901265; GO:0005488; GO:0097159; GO:1901363; GO:0003674 [GO:0003723]; GO:0003676; GO:0097159; GO:1901363; GO:0005488; GO:0003674 [GO:0003746]; GO:0008135; GO:0003723; GO:0003676; GO:0097159; GO:1901363; GO:0005488; GO:0003674 [GO:0003924]; GO:0017111; GO:0016462; GO:0016818; GO:001681…	Pf00009, Pf03143, Pf03144	50.109	149069	0.0324675	1
Q5VTE0.1	Q05639.1; P68104.1	Putative elongation factor 1-alpha-like 3	EEF1A1P5	[GO:0000166]; GO:0036094; GO:1901265; GO:0005488; GO:0097159; GO:1901363; GO:0003674 [GO:0003674] [GO:0003746]; GO:0008135; GO:0003723; GO:0003676; GO:0097159; GO:1901363; GO:0005488; GO:0003674 [GO:0003924]; GO:0017111; GO:0016462; GO:0016818; GO:0016817; GO:0016787; GO:0003824; GO:0003674 [GO:0005525]; GO:0032550; GO:0032561; GO:0035639; GO:0001883; GO:0032549; GO:0019001; GO:0032555; GO:004316…	Pf00009, Pf03143, Pf03144	50.153	149069	0.0324675	1
P00558.3	P07205.3	Phosphoglycerate kinase 1	PGK1	[GO:0000166]; GO:0036094; GO:1901265; GO:0005488; GO:0097159; GO:1901363; GO:0003674 [GO:0004618]; GO:0016301; GO:0016774; GO:0016772; GO:0016740; GO:0003824; GO:0003674 [GO:0005515]; GO:0005488; GO:0003674 [GO:0005524]; GO:0032559; GO:0035639; GO:0030554; GO:0032555; GO:0043168; GO:1901265; GO:0017076; GO:0032553; GO:0043167; GO:0097159; GO:1901363; GO:0000166; GO:0097367; GO:0005488; GO:0036094…	Pf00162	44.586	144967	0.0239808	1
